# Supplementary material for: Structural basis for human mitochondrial tRNA maturation
Source: PubMed Central journal article supplement (PMC11144196; doi:10.1038/s41467-024-49132-0), 2024-06-01
Supplement: 41467_2024_49132_MOESM1_ESM.pdf [file 41467_2024_49132_MOESM1_ESM.pdf]

Supplementary Information for:

## **Structural basis for human mitochondrial tRNA maturation**

Vincent Meynier<sup>1</sup>, Steven W. Hardwick<sup>2</sup>, Marjorie Catala<sup>1</sup>, Johann J. Roske<sup>2</sup>, Stephanie Oerum<sup>1</sup>, Dimitri Y. Chirgadze<sup>2</sup>, Pierre Barraud<sup>1</sup>, Wyatt W. Yue<sup>3,4</sup>, Ben F. Luisi<sup>2</sup> & Carine Tisné<sup>1\*</sup>

<sup>1</sup>Expression Génétique Microbienne, Université Paris Cité, CNRS, Institut de Biologie Physico-Chimique (IBPC), 75005 Paris, France.

<sup>2</sup>Department of Biochemistry, University of Cambridge, Tennis Court Road, Cambridge CB2 1GA, U.K.

<sup>3</sup>Centre for Medicines Discovery, Nuffield Department of Clinical Medicine, University of Oxford, Oxford OX3 7DQ, UK

<sup>4</sup>Present address: Biosciences Institute, Newcastle University, Newcastle upon Tyne, NE2 4HH, UK

The file includes Supplementary Table 1 and Supplementary Fig. 1-14.

**Supplementary Table 1. Cryo-EM data collection and refinement statistics**

| <b>Structure</b>                          | <b>Complex 1</b><br>TRMT10C/SDR5C1<br>pre-tRNA <sup>Ile</sup> | <b>Complex 2</b><br>TRMT10C/SDR5C1<br>pre-tRNA <sup>His-Ser</sup><br>PRORP | <b>Complex 3</b><br>TRMT10C/SDR5C1<br>pre-tRNA <sup>His(0,Ser)</sup><br>ELAC2 | <b>Complex 4</b><br>TRMT10C/SDR5C1<br>pre-tRNA <sup>Ile</sup><br>TRNT1 |
|-------------------------------------------|---------------------------------------------------------------|----------------------------------------------------------------------------|-------------------------------------------------------------------------------|------------------------------------------------------------------------|
| PDB code                                  | 8CBO                                                          | 8CBK                                                                       | 8CBL                                                                          | 8CBM                                                                   |
| EMDB code                                 | EMD-16547                                                     | EMD-16544                                                                  | EMD-16543                                                                     | EMD-16545                                                              |
| <b>Data collection</b>                    |                                                               |                                                                            |                                                                               |                                                                        |
| EM equipment                              | Titan Krios                                                   | Titan Krios                                                                | Titan Krios                                                                   | Titan Krios                                                            |
| Voltage (kV)                              | 300                                                           | 300                                                                        | 300                                                                           | 300                                                                    |
| Detector                                  | Gatan K3                                                      | Gatan K3                                                                   | Gatan K3                                                                      | Gatan K3                                                               |
| Mode                                      | Counting, super resolution                                    | Counting, super resolution                                                 | Counting super resolution                                                     | Counting, super resolution                                             |
| Nominal magnification                     | 105,000x                                                      | 130,000x                                                                   | 130,000x                                                                      | 130,000x                                                               |
| Pixel size (Å per pixel area)             | 0.723                                                         | 0.652                                                                      | 0.652                                                                         | 0.652                                                                  |
| Electron dose, total (e-/Å <sup>2</sup> ) | 40.10                                                         | 48.52                                                                      | 48.90                                                                         | 42,20                                                                  |
| Defocus range (µm)                        | -0.9 to -2.5                                                  | -0.9 to -2.4                                                               | -0.9 to -2.4                                                                  | -0.8 to -2.2                                                           |
| Exposure (s)                              | 3.0                                                           | 1.34                                                                       | 1.34                                                                          | 1.24                                                                   |
| Frames                                    | 40                                                            | 150                                                                        | 50                                                                            | 46                                                                     |
| Number of micrographs                     | 6,474                                                         | 7,573                                                                      | 10,927                                                                        | 9,644                                                                  |
| <b>Processing</b>                         |                                                               |                                                                            |                                                                               |                                                                        |
| Software                                  | Relion 3.1.0                                                  | WARP<br>CryoSPARC v3.1                                                     | WARP<br>Cryosparc v3.1                                                        | WARP<br>CryoSparc v4.0                                                 |
| Initial number of particles               | 1,536,128                                                     | 1,789,726                                                                  | 2,049,642                                                                     | 2,420,733                                                              |
| Final number of particles                 | 141,653                                                       | 81,396                                                                     | 74,166                                                                        | 25,554                                                                 |
| Symmetry imposed                          | C1                                                            | C1                                                                         | C1                                                                            | C1                                                                     |
| Map resolution, FSC <sub>0.143</sub> (Å)  | 3.20                                                          | 2.76 (Map 1)<br>2.74 (Map 2)<br>4.50 (Map 3)                               | 2.79 (Map 1)<br>2.47 (Map 2)<br>4.05 (Map 3)                                  | 3.14 (Map 1)<br>4.50 (Map 2)                                           |
| Map resolution range (Å)                  | 2.6-6.5                                                       | 2.5-6.8 (Map 1)<br>2.5-6.5 (Map 2)<br>4.0-7.9 (Map 3)                      | 2.5-6.8 (Map 1)<br>2.5-6.8 (Map 2)<br>3.6-8.8 (Map 3)                         | 2.9-7.2 (Map 1)<br>4.0-7.2 (Map 2)                                     |
| Map-sharpening B-factor (Å <sup>2</sup> ) | -133.7                                                        | -70.7 (Map 1)<br>-68.5 (Map 2)<br>-246.1 (Map 3)                           | -69.9 (Map 1)<br>-63.8 (Map 2)<br>-191.3 (Map 3)                              | -60.7 (Map 1)<br>-183.4 (Map 2)                                        |
| <b>Model composition</b>                  |                                                               |                                                                            |                                                                               |                                                                        |
| Non-hydrogen atoms                        | 10626                                                         | 16223                                                                      | 17251                                                                         | 14576                                                                  |
| Protein residues                          | 1232                                                          | 1834                                                                       | 2007                                                                          | 1701                                                                   |
| RNA bases                                 | 58                                                            | 93                                                                         | 86                                                                            | 66                                                                     |
| Ligand                                    | 5                                                             | 7                                                                          | 6                                                                             | 6                                                                      |
| <b>Refinement</b>                         |                                                               |                                                                            |                                                                               |                                                                        |
| Initial model used (PDB code)             | 7ONU, 5NFJ,<br>Complex 4                                      | 7ONU, 5NFJ<br>AF-Q7L0Y3,<br>AF-O15091,<br>Complex 3                        | 7ONU, 5NFJ,<br>AF-Q7L0Y3,<br>AF-Q9BQ52,<br>Complex 2                          | 7ONU, 5NFJ,<br>AF-Q7L0Y3,<br>AF-Q96Q11,<br>Complex 1                   |
| Software                                  | Phenix-1.20.1-4487                                            | Phenix-1.20.1-4487                                                         | Phenix-1.20.1-4487                                                            | Phenix-1.20.1-4487                                                     |
| Correlation coefficient, masked           | 0.81                                                          | 0.84                                                                       | 0.75                                                                          | 0.83                                                                   |
| <b>Model validation</b>                   |                                                               |                                                                            |                                                                               |                                                                        |

---

|                                      |       |       |       |       |
|--------------------------------------|-------|-------|-------|-------|
| MolProbity score                     | 1.58  | 1.61  | 1.57  | 1.66  |
| All-atom clash score                 | 5.37  | 6.17  | 5.97  | 7.65  |
| Poor rotamers                        | 0.00  | 0.00  | 0.00  | 0.00  |
| <i>Ramachandran statistics (%)</i> : |       |       |       |       |
| Favoured (overall)                   | 95.74 | 95.99 | 96.34 | 96.38 |
| Allowed (overall)                    | 4.26  | 4.01  | 3.66  | 3.62  |
| Outliers (overall)                   | 0.00  | 0.00  | 0.00  | 0.00  |
| <i>RMS deviations</i> :              |       |       |       |       |
| Bond length (Å)                      | 0.003 | 0.002 | 0.002 | 0.003 |
| Bond angle (°)                       | 0.480 | 0.476 | 0.486 | 0.446 |

---

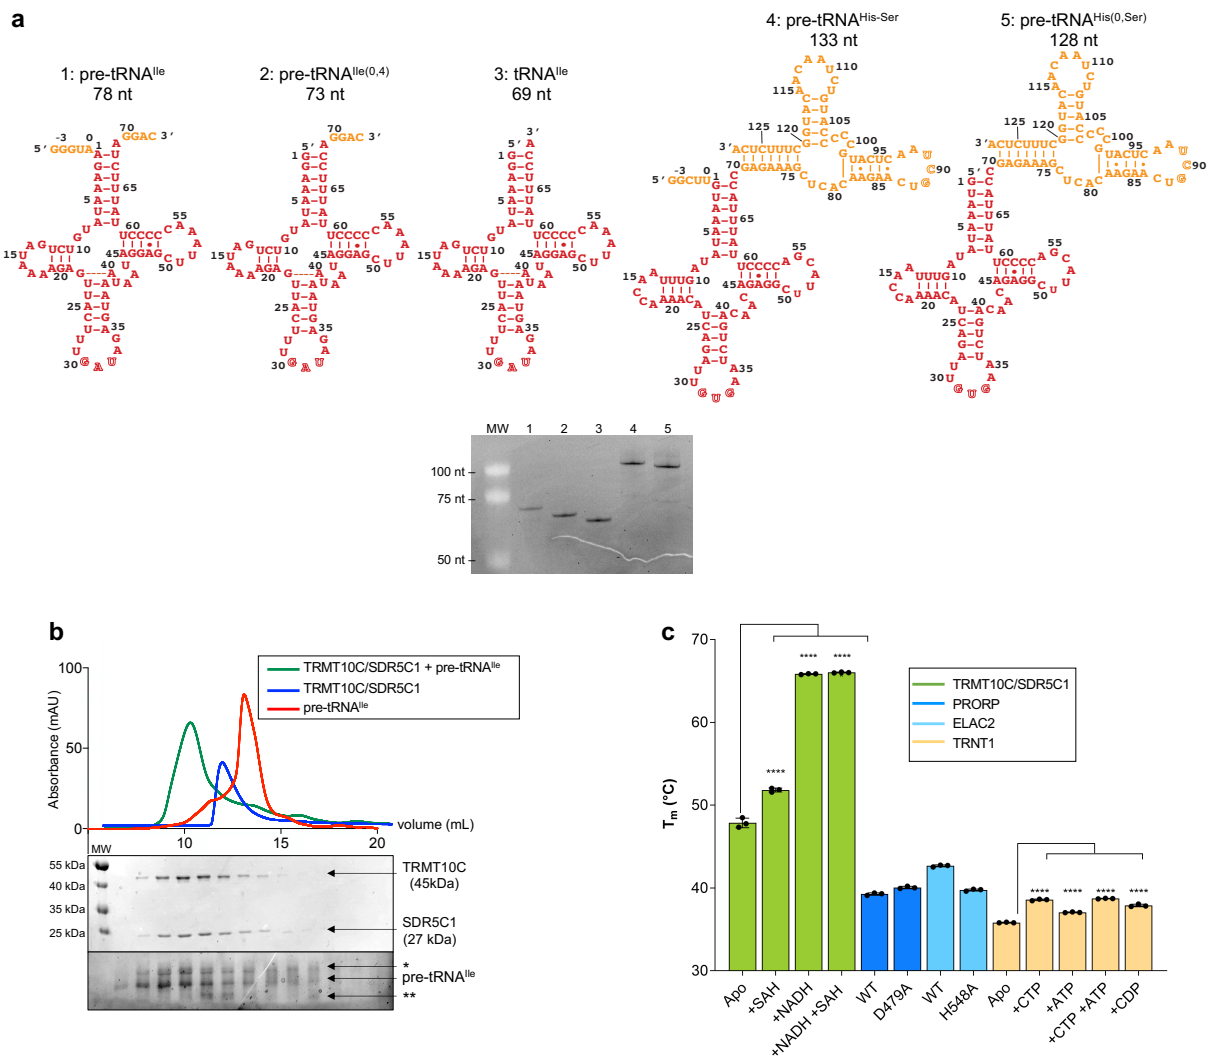

**Supplementary Fig. 1 | Biochemical characterization of TRMT10C/SDR5C1/tRNA<sup>Ile</sup> complex and stability of the maturation enzymes in presence of their cofactors or analogues.** **a** Secondary structure of pre-tRNA used in this study, the 5'-leader and 3'-trailer are indicated in orange, tRNA<sup>Ser</sup>(AGY) is the 3'-trailer of tRNA<sup>His</sup>, the nucleotide numbering (in black) is that used in the structure coordinates deposited in the PDB. 16% urea gel analysis of the tRNA samples used in this study. **b** Analytical size exclusion chromatography (Superdex 200 increase 10/300 GL) of TRMT10C/SDR5C1 in presence of pre-tRNA<sup>Ile</sup> which confirms that TRMT10C/SDR5C1 forms a stable complex with pre-tRNA<sup>Ile</sup>, 14% SDS-PAGE gel analysis of the fractions stained first with ethidium bromide to observe the pre-tRNA and then with Coomassie blue to observe the proteins. The high (\*) and low (\*\*) molecular weight bands are present in the pre-tRNA sample alone and probably correspond to species that are not properly folded. **c** Melting temperatures (T<sub>m</sub>, in °C) measured from DSF experiments of TRMT10C/SDR5C1 (in green), PRORP and PRORP<sub>D479A</sub> (in dark blue), ELAC2 and ELAC2<sub>H548A</sub> (in cyan) and TRNT1 (in beige) with no ligand (Apo) or in the presence of cofactors or analogues. Data were analysed by one-way ANOVA using a Dunnett's multiple comparison test, n = 3 technical replicates, \*\*\*\* for P < 0.0001. Source data are provided as a Source Data file.

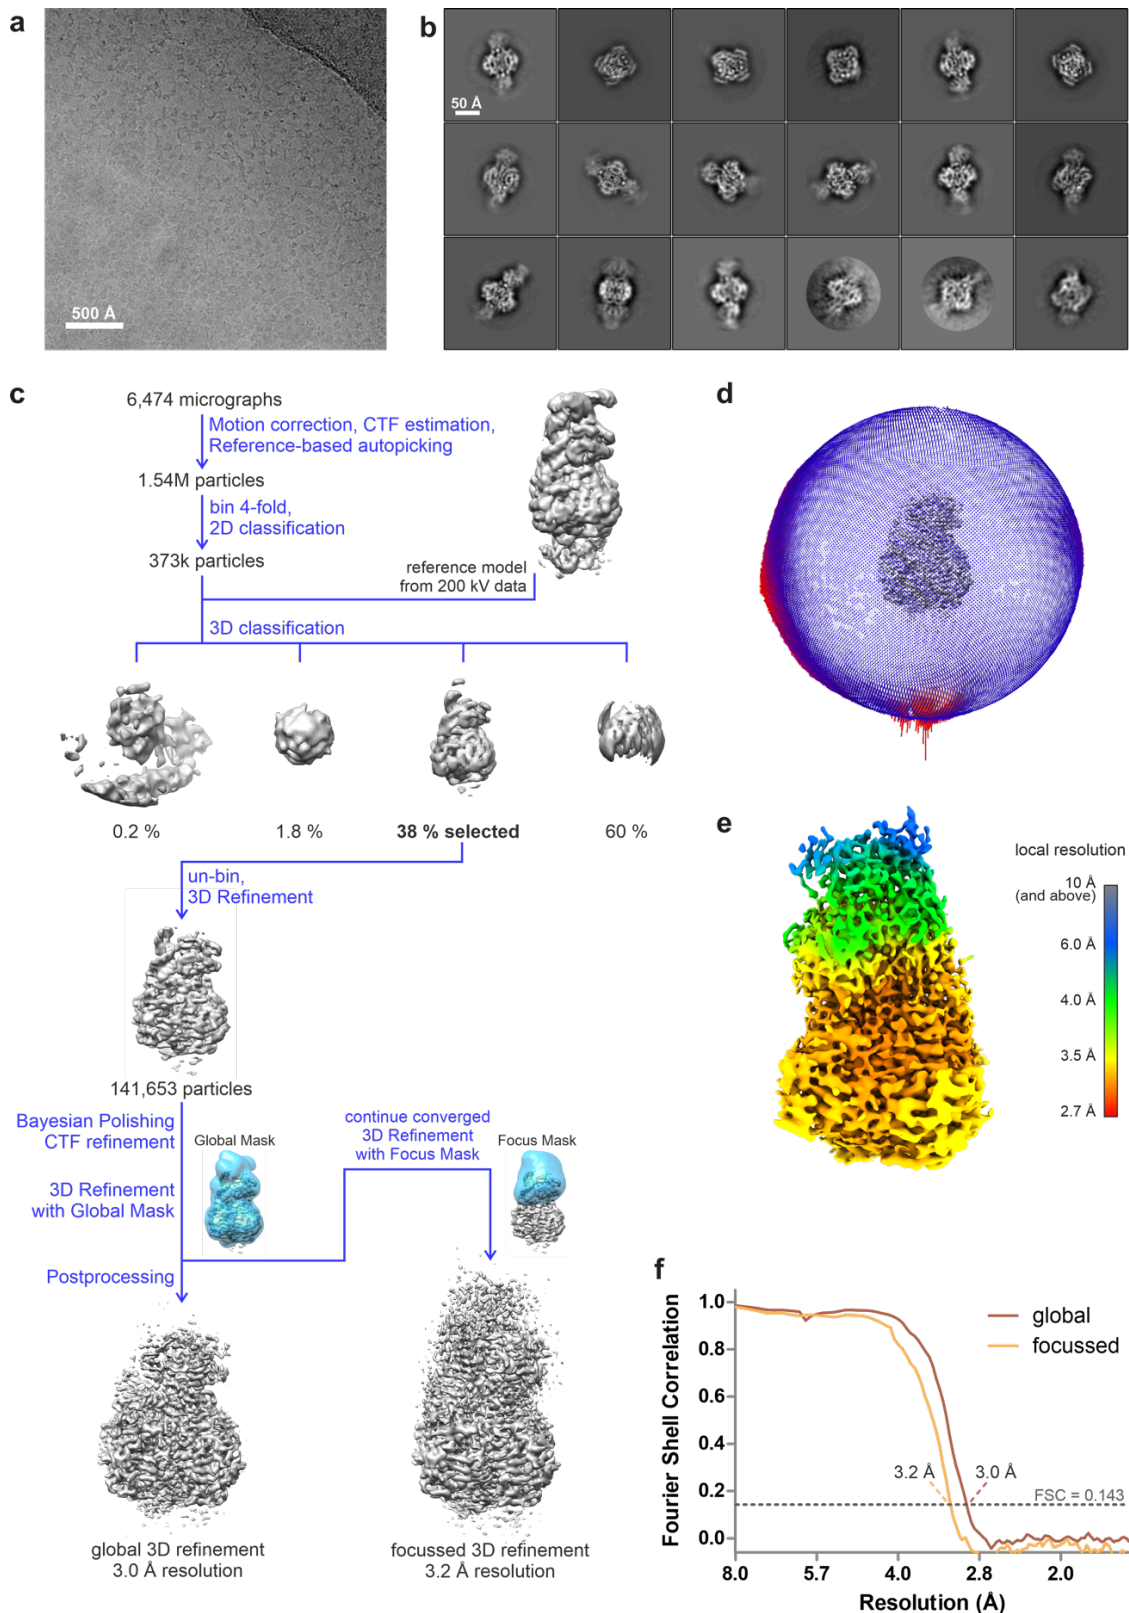

**Supplementary Fig. 2 | Cryo-EM analysis of the TRMT10C/SDR5C1/pre-tRNA<sup>Ile</sup> complex.** **a** Example micrograph after Motion Correction and CTF estimation. Scale bar, 50 nm. **b** Representative 2D class averages generated in Relion using the final particle set. Scale bar, 5 nm. **c** Image processing workflow. **d**, 3D representation of angular distributions of the particles used for the final map. **e** Refined 3D map coloured by local resolution calculated in Relion. **f** Fourier Shell Correlation (FSC) plots for the two final refinements using global or focus masks (shown in (c)), respectively. Resolution is indicated at the FSC=0.143 cut-off.

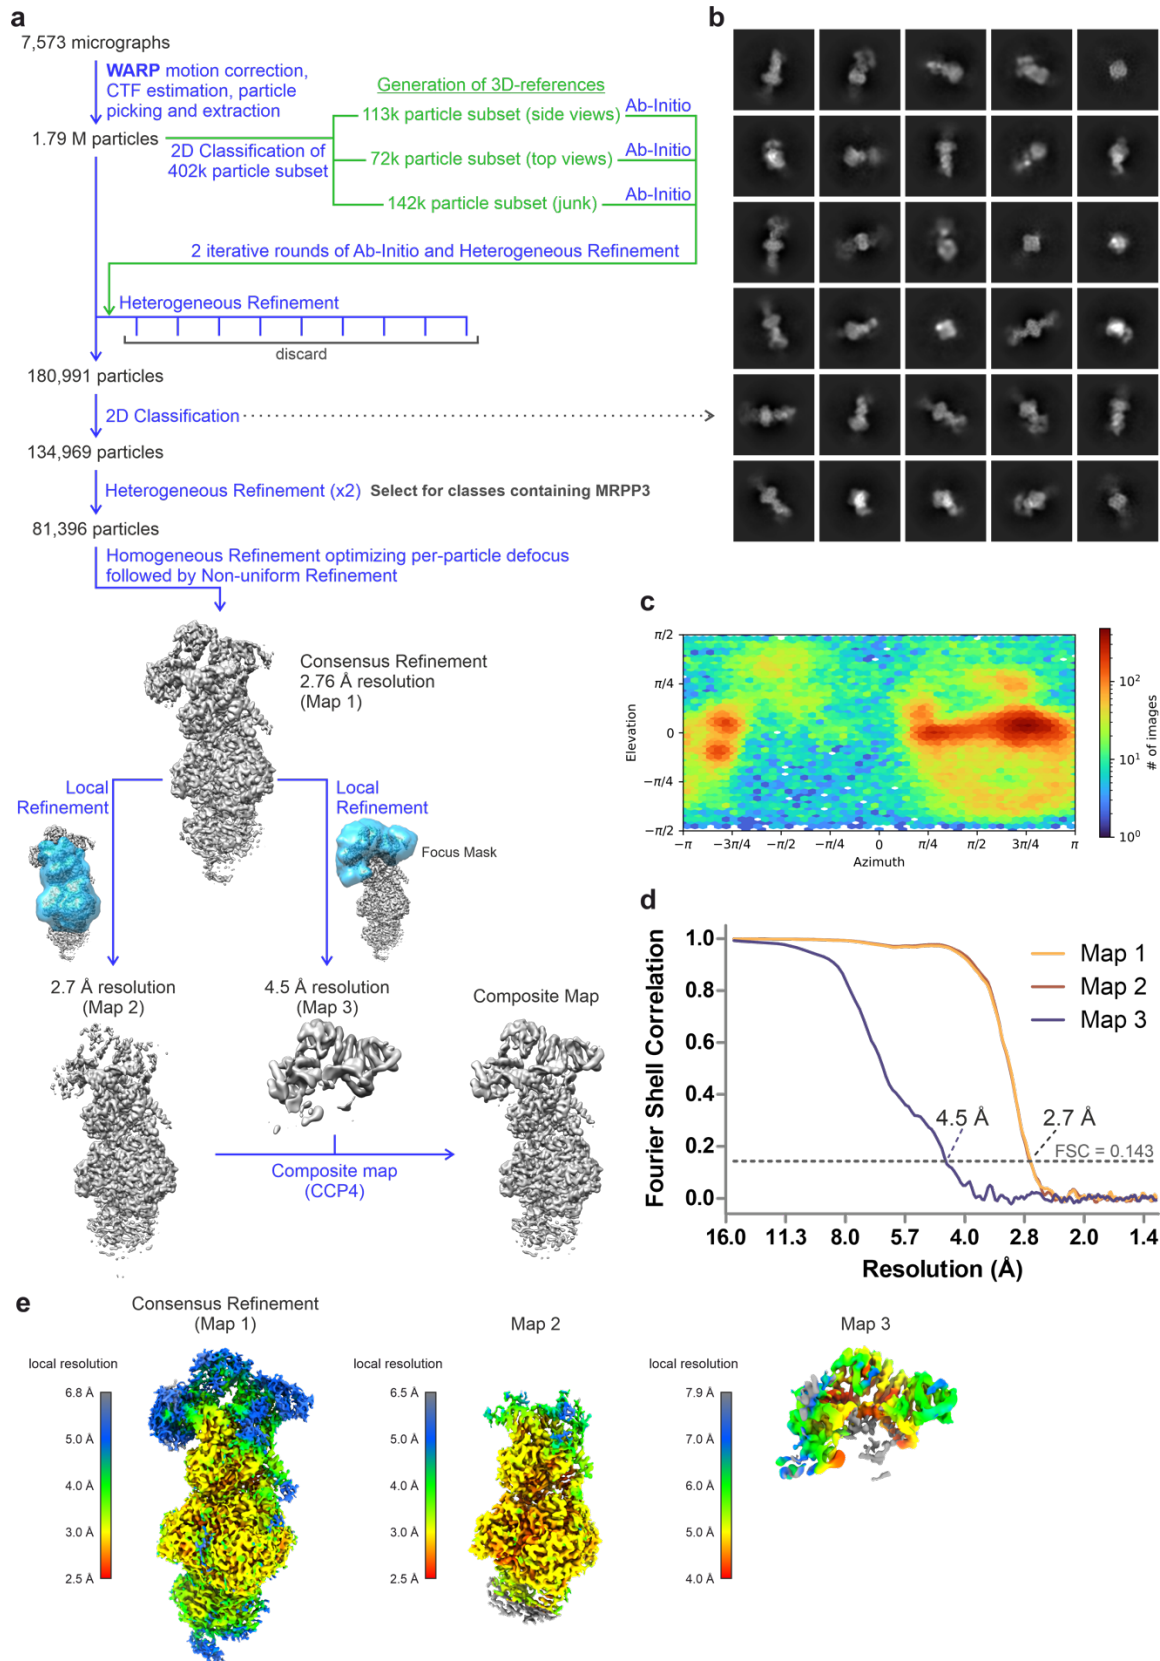

**Supplementary Fig. 3 | Cryo-EM analysis of the TRMT10C/SDR5C1/pre-tRNA<sup>His-Ser</sup>/PRORP complex. a** Image processing workflow. **b** Representative 2D class averages generated in cryoSPARC. **c** Angular distribution plot of the final particle set after consensus refinement. **d** Fourier Shell Correlation (FSC) plots for the three final refinements shown in (a), Maps 1-3, respectively. Resolution is indicated at the FSC=0.143 cut-off. **e** Maps 1-3 from the three final refinements (a), coloured by local resolution calculated in CryoSPARC.

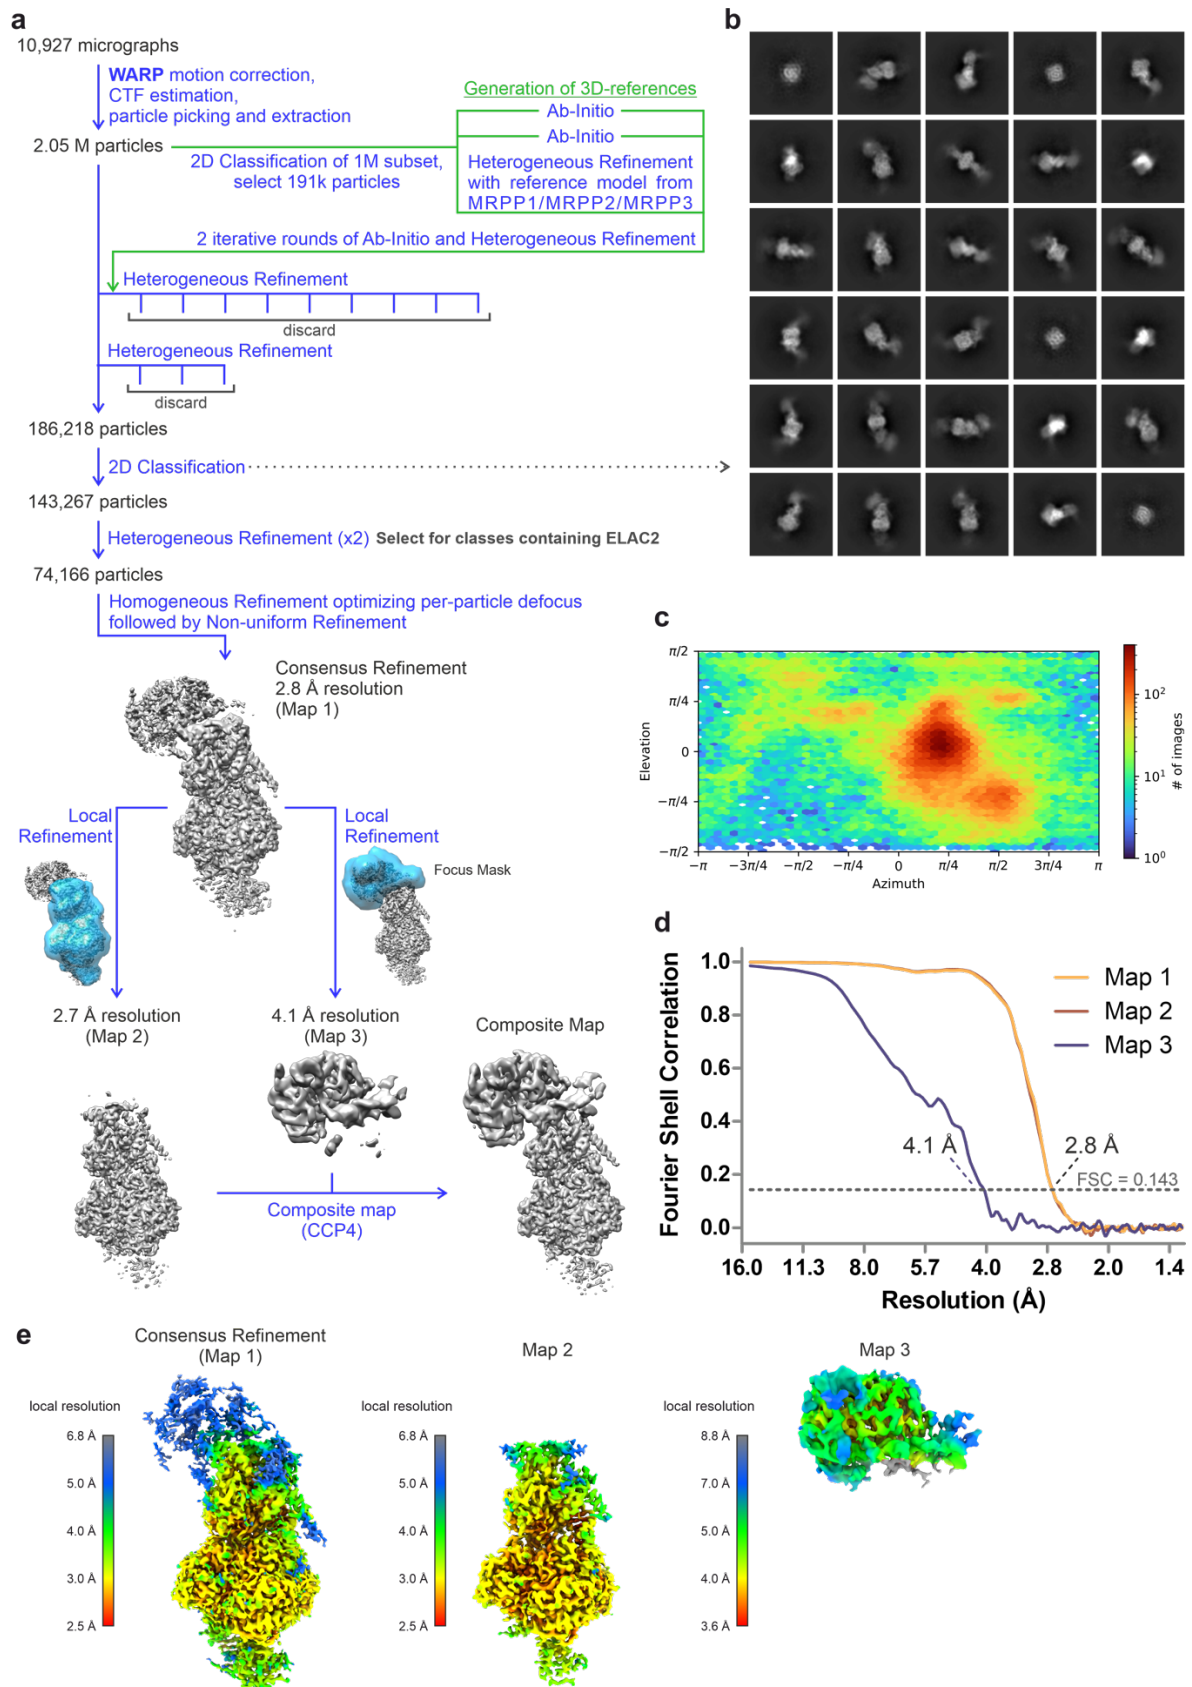

**Supplementary Fig. 4 | Cryo-EM analysis of the TRMT10C/SDR5C1/pre-tRNA<sup>His(0,Ser)</sup>/ELAC2 complex. a** Image processing workflow. **b** Representative 2D class averages generated in cryoSPARC. **c** Angular distribution plot of the final particle set after consensus refinement. **d** Fourier Shell Correlation (FSC) plots for the three final refinements shown in (a), Maps 1-3, respectively. Resolution is indicated at the FSC=0.143 cut-off. **e** Maps 1-3 from the three final refinements (a), coloured by local resolution calculated in CryoSPARC.

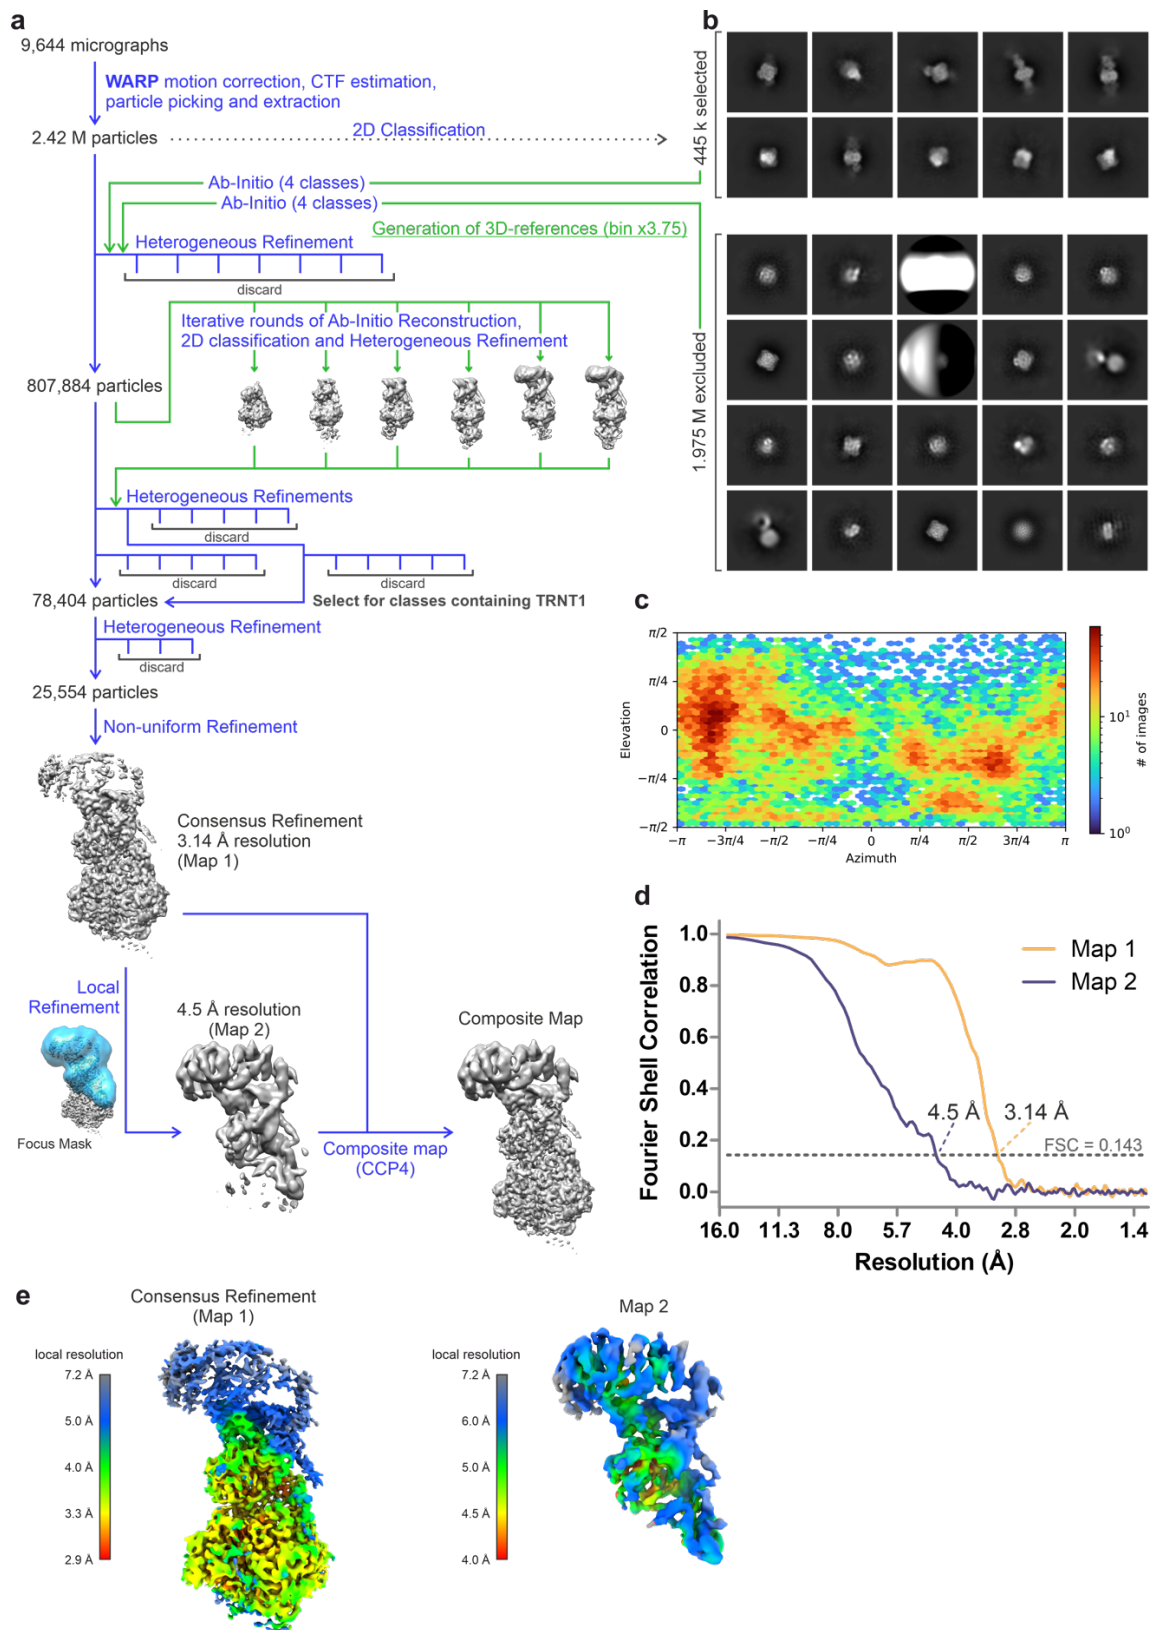

**Supplementary Fig. 5 | Cryo-EM analysis of the TRMT10C/SDR5C1/pre-tRNA<sup>Ile</sup>/TRNT1 complex.** **a** Image processing workflow. **b** Representative 2D class averages generated in cryoSPARC. **c**, Angular distribution plot of the final particle set after consensus refinement. **d** Fourier Shell Correlation (FSC) plots for the two final (consensus and local) refinements shown in (a). Resolution is indicated at the FSC=0.143 cut-off. **e** Maps 1 and 2 from the final consensus and local refinements (a), coloured by local resolution calculated in CryoSPARC.



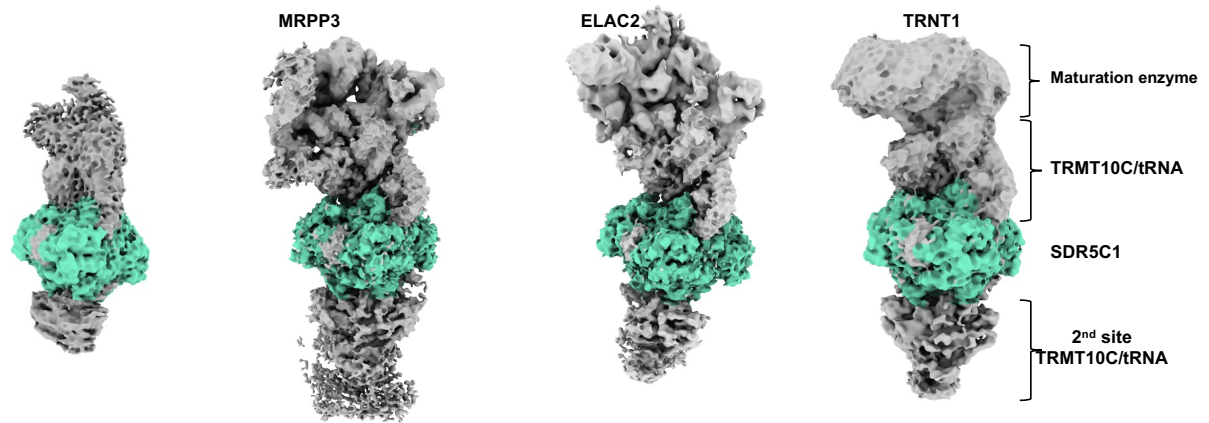

**Supplementary Fig. 6 | cryo-EM density maps of the human mt tRNA maturation complexes.** Consensus maps showing the second site of binding of the TRMT10C/tRNA complex on SDR5C1 from left to right: TRMT10C/SDR5C1/pre-tRNA<sup>Ile</sup>, TRMT10C/SDR5C1/pre-tRNA<sup>His-Ser</sup>/PRORP<sub>D479A</sub>, TRMT10C/SDR5C1/pre-tRNA<sup>His(0,Ser)</sup>/ELAC2<sub>H548A</sub>, TRMT10C/SDR5C1/tRNA<sup>Ile</sup>/TRNT1/CDP.

**a**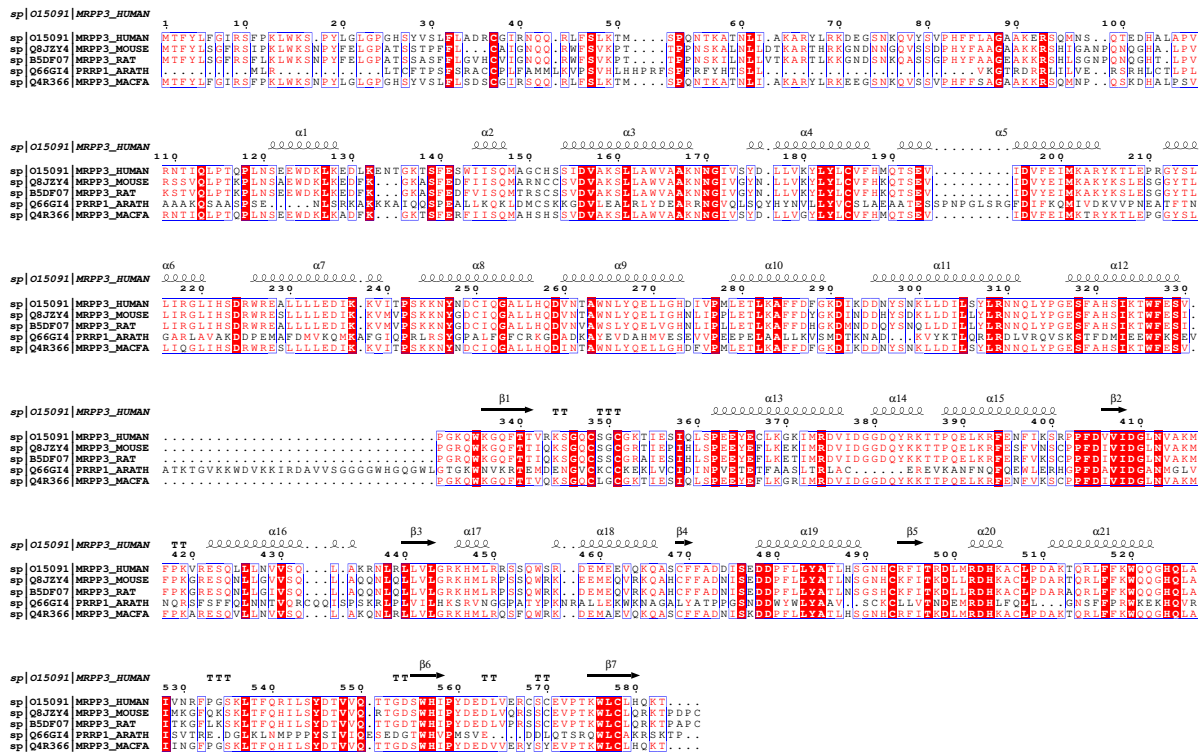**b**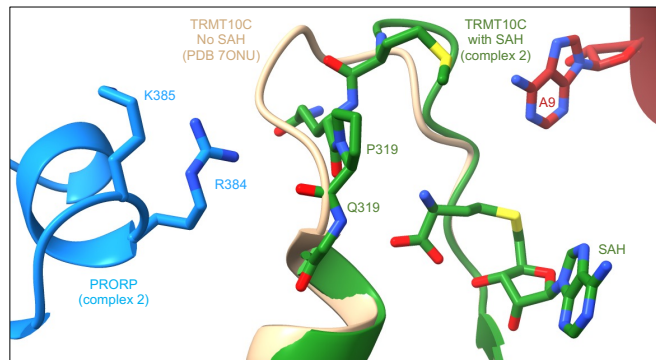

**Supplementary Fig. 7 | PRORP sequence conservation and PRORP interaction with TRMT10C active site.**  
**a** Multiple sequence alignment of a representative set of PRORP sequences with colour coding from ESPrict<sup>1</sup>. The secondary structure of the human PRORP is shown above the alignment and the sequences are numbered according to human PRORP. Abbreviations for sequences are as follows: HUMAN: *Homo Sapiens* (Uniprot O15091), Mouse: *Mus musculus* (Uniprot Q8JZY4), RAT: *Rattus norvegicus* (Uniprot B5DF07), ARATH: *Arabidopsis thaliana* (Uniprot Q66GI4), MACFA: *Macaca fascicularis* (Uniprot Q4R366). **b** Movement of the SAM-binding loop in the MTase domain of TRMT10C upon binding of SAH, TRMT10C in complex 2 in green and PRORP in complex 2 in blue, the structure with tRNA and without SAH is PDB 7ONU (in beige).



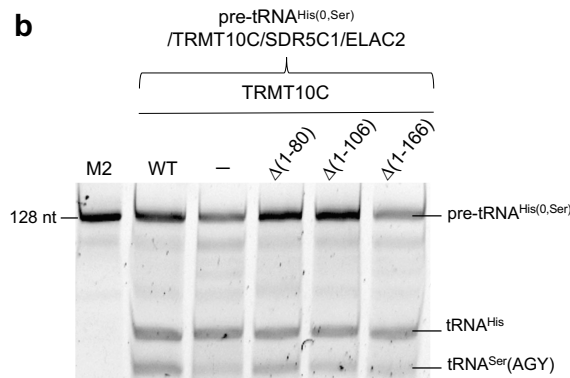

**Supplementary Fig. 8 | Conserved residues in ELAC2 and ELAC2 cleavage assays on a pre-tRNA bound in TRMT10C deletion mutants/SDR5C1 complex.** **a** Multiple sequence alignment of a representative set of ELAC2 sequences with colour coding from ESPript<sup>1</sup>. The secondary structure of the human ELAC2 is shown above the alignment and the sequences are numbered according to ELAC2. Abbreviations for sequences are as follows: HUMAN: *Homo sapiens* (Uniprot Q9BQ52), MOUSE: *Mus musculus* (Uniprot Q80Y81), RAT: *Rattus norvegicus* (Uniprot Q8CGS5), ARATH: *Arabidopsis thaliana* (Uniprot Q8LGU7), YEAST: *Saccharomyces cerevisiae* (Uniprot P36159), SCHPO: *Schizosaccharomyces pombe* (Uniprot Q10155), CAEEL: *Caenorhabditis elegans* (Uniprot O44476) and DROME: *Drosophila melanogaster* (Uniprot Q8MKW7). The stars in purple indicate the residues involved in Mg<sup>2+</sup> coordination in the catalytic site of ELAC2. **b** Cleavage assays of ELAC2 on pre-tRNA<sup>His(0,Ser)</sup> using TRMT10C deletion mutants in complex with SDR5C1. Marker M2 is pre-tRNA<sup>His(0,Ser)</sup> (128 nt). WT: TRMT10C/SDR5C1/ELAC2/pre-tRNA<sup>His(0,Ser)</sup>, (-): ELAC2/pre-tRNA<sup>His(0,Ser)</sup>. The gel is representative of three experiments, uncropped gel is in Source Data file.

**a**

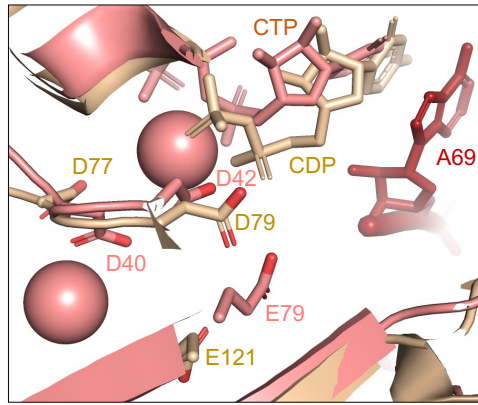

**b**

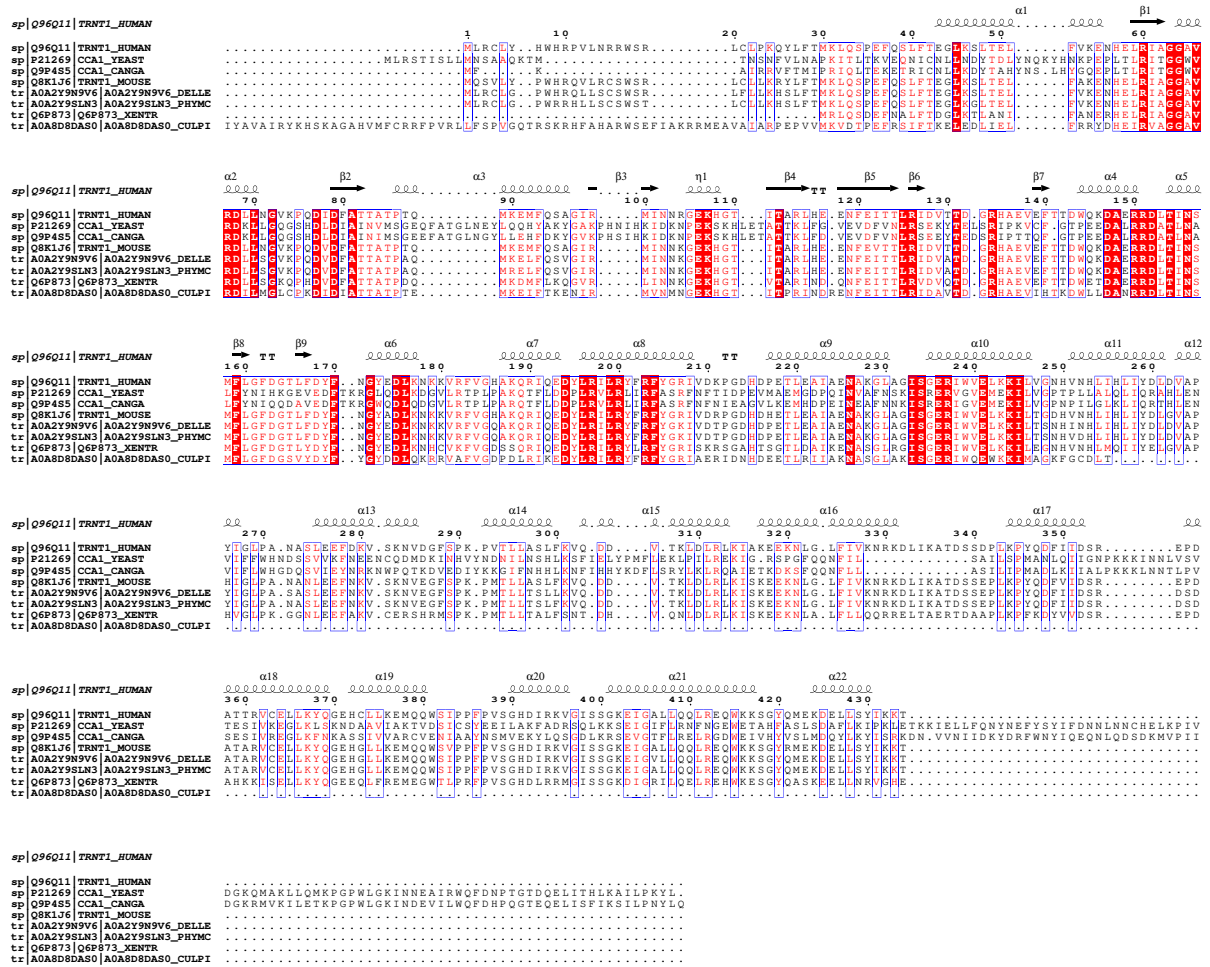

**c**

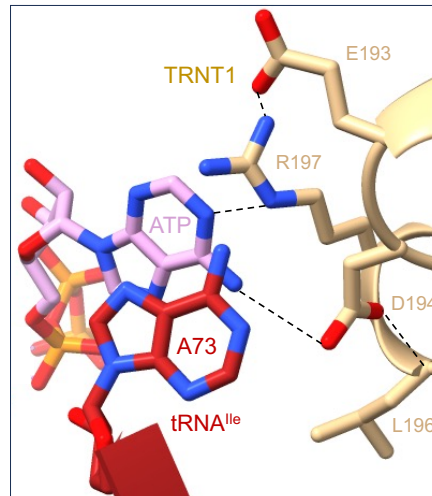

**Supplementary Fig. 9 | TRNT1 metal-binding and sequence conservation. a** Superimposition of the TRNT1 active site (in beige) with the crystal structure of *B. stearothermophilus* CCA-adding enzyme in complex with CTP and Mg<sup>2+</sup> ions (in light magenta, PDB 1MIY). **b** Multiple sequence alignment of a representative set of TRNT1 sequences with colour coding from ESPrpt<sup>1</sup>. The secondary structure of the human TRNT1 is shown above the alignment and the sequences are numbered according to human TRNT1. Abbreviations for sequences are as follows: HUMAN: *Homo Sapiens* (Uniprot Q96Q11), YEAST: *Saccharomyces cerevisiae* (Uniprot P21269), CANGA: *Candida glabrata* (Uniprot Q9P4S5), MOUSE: *Mus musculus* (Uniprot Q8K1J6), DELLE: *Delphinapterus leucas* (Uniprot A0A2Y9N9V6), PHYMC: *Physeter macrocephalus* (Uniprot A0A2Y9SLN3), XENTR: *Xenopus tropicalis* (Uniprot Q6P873) and CULPI: *Culex pipiens* (Uniprot A0A8D8DAS0). **c** Base-specific interactions between TRNT1 and ATP (ATP from PDB 1MIW).

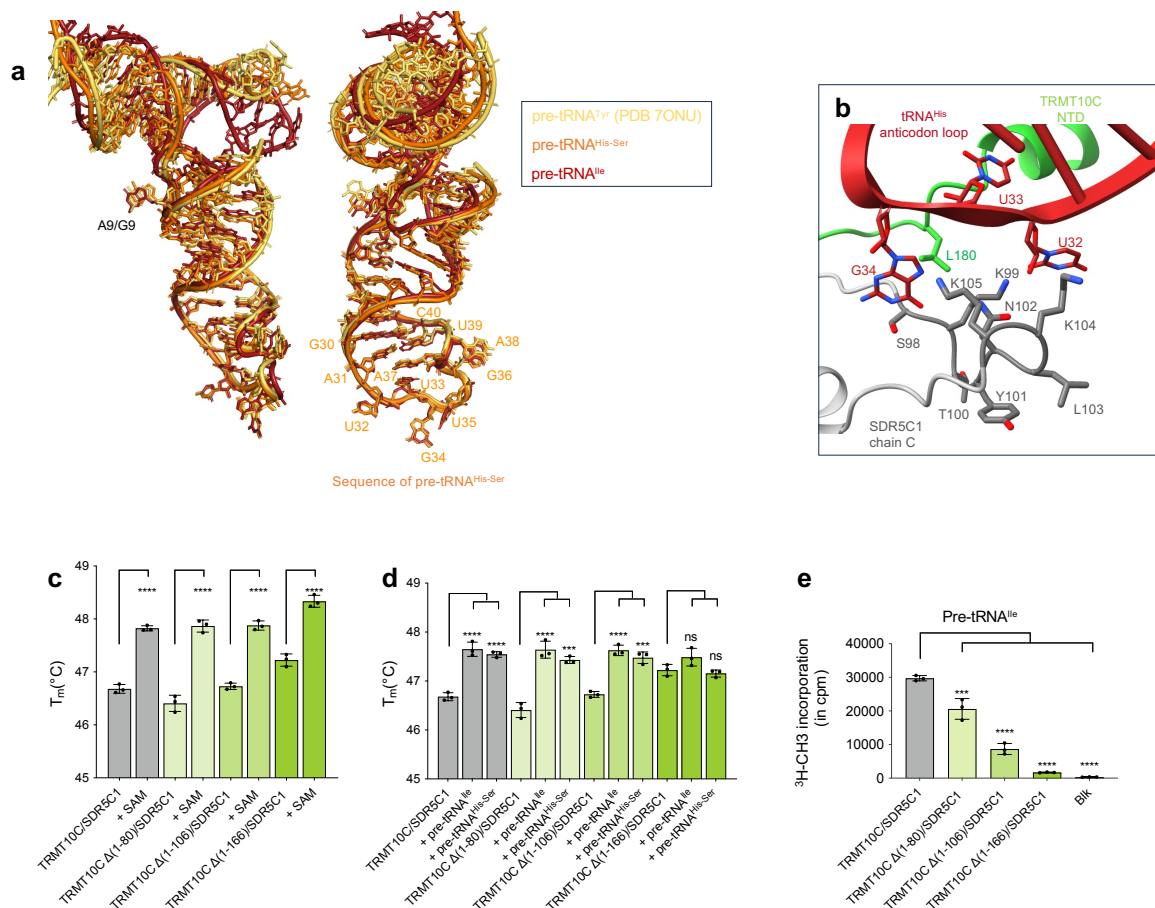

**Supplementary Fig. 10 | mt tRNA interactions with TRMT10C.** **a** Superimposition of pre-tRNA<sup>His-Ser</sup> (in orange), pre-tRNA<sup>Ile</sup> (in red) and pre-tRNA<sup>Tyr</sup> (PDB 7ONU, in yellow), tRNA<sup>Ser</sup> is not shown for the sake of clarity. **b** Interaction between the anticodon loop of tRNA<sup>His</sup> and SDR5C1. **c** Melting temperatures (T<sub>m</sub>, in °C) of TRMT10C deletion mutants in presence or in absence of SAM, TRMT10C/SDR5C1 WT (in grey), TRMT10C Δ(1-80)/SDR5C1 in light green, TRMT10C Δ(1-106)/SDR5C1 in green and TRMT10C Δ(1-166)/SDR5C1 in lime, measured from DSF experiments. Data were analysed by one-way ANOVA using a F test statistic, n=3 technical replicates, \*\*\*\* is for P-value < 0.0001. **d** Melting temperatures (T<sub>m</sub>, in °C) of TRMT10C deletion mutants in presence of pre-tRNA<sup>Ile</sup> or pre-tRNA<sup>His-Ser</sup> measured from DSF experiments, color as in b. Data were analysed by one-way ANOVA using a F test statistic, n=3 technical replicates, P-values are indicated as follow: ns for 0.0846 (TRMT10C Δ(1-166)/SDR5C1) or 0.7492 (Blk), \*\*\* for P = 0.0002 and \*\*\*\* for P < 0.0001. **e** MTase assays of TRMT10C deletion mutants on pre-tRNA<sup>Ile</sup>, Blk: assay without pre-tRNA, color as in b. Data were analysed by one-way ANOVA using a Dunnett's multiple comparison test, n=3 technical replicates, P-values are indicated as follows: \*\*\* for P = 0.001 and \*\*\*\* for P < 0.0001. Source data are provided as a Source Data file.

**a**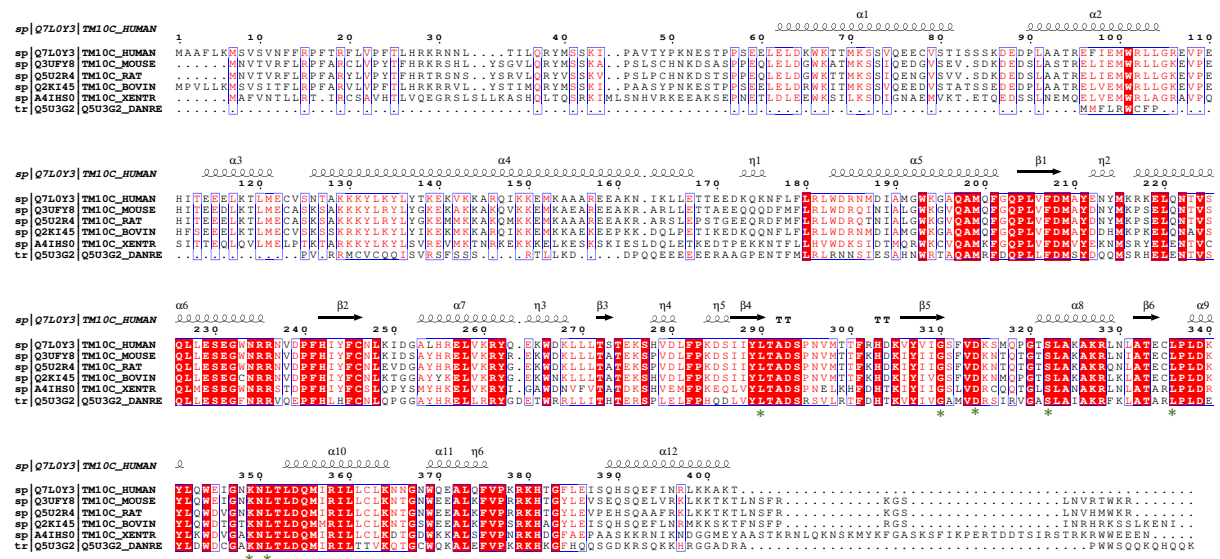**b**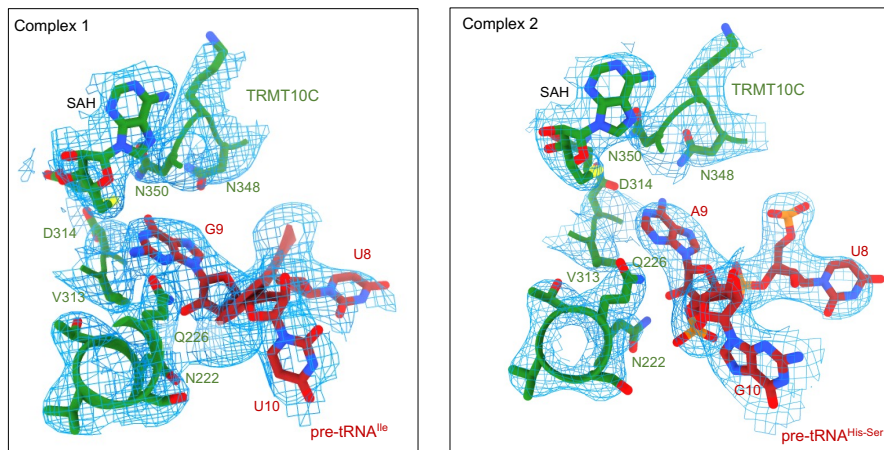**c**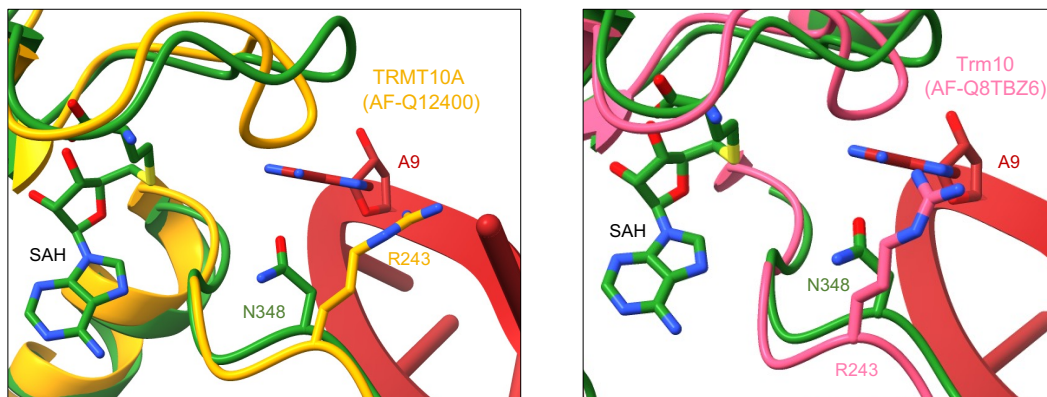

**Supplementary Fig. 11 | TRMT10C sequence conservation and active site organization.** **a** Multiple sequence alignment of a representative set of TRMT10C sequences from eukaryotes with colour coding from ESPrnt<sup>1</sup>. The secondary structure of the human TRMT10C is shown above the alignment and the sequences are numbered according to human TRMT10C. Abbreviations for sequences are as follows: HUMAN: *Homo sapiens* (Q7L0Y3), MOUSE: *Mus musculus* (Uniprot Q3UFY8), RAT: *Rattus norvegicus* (Uniprot Q5U2R4), BOVIN: *Bos taurus* (Uniprot Q2KI45), XENTR: *Xenopus tropicalis* (Uniprot A4IHS0) and DANRE: *Danio rerio* (Uniprot Q5U3G2). Green stars indicate TRMT10C residues involved in SAH binding. **b** Model-to-map fit for G9 and SAH in complex 1 and A9 and SAH in complex 2. **c** Comparison of the active sites of TRMT10C (m<sup>1</sup>A9/m<sup>1</sup>G9 activity) with human TRMT10A (left, AF-Q12400) and *S. cerevisiae* Trm10 (right, AF-Q8TBZ6), both with m<sup>1</sup>G9 MTase activity.





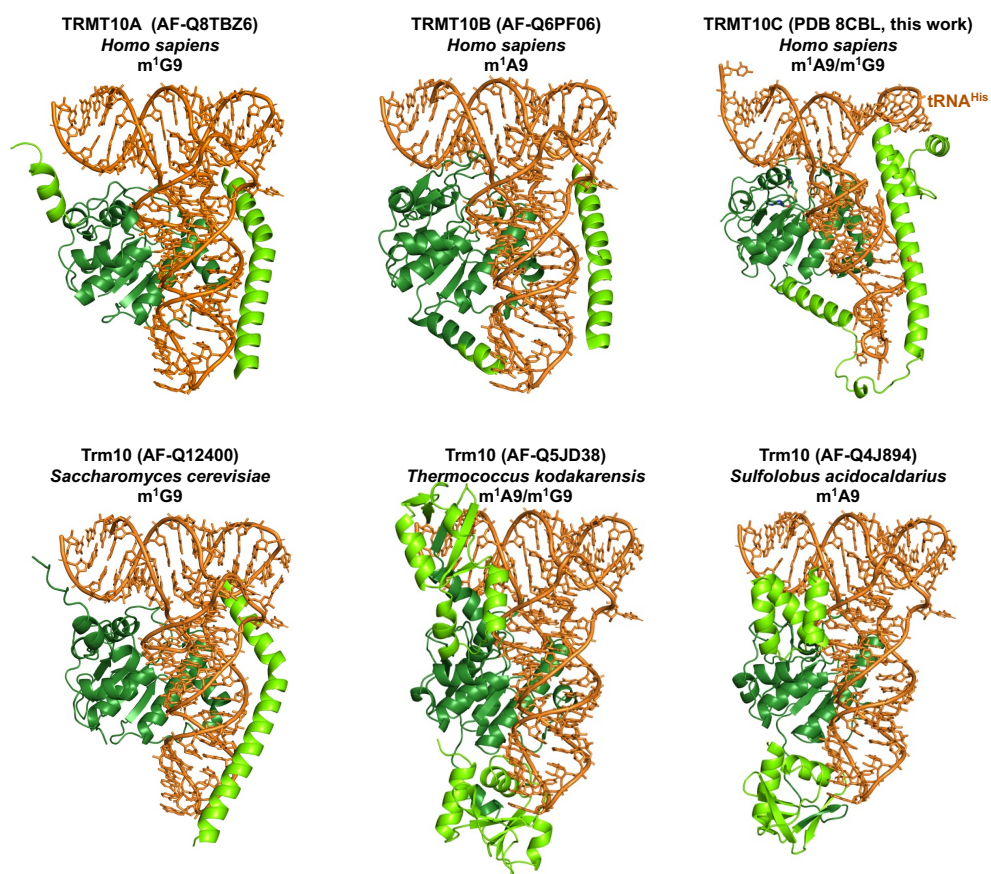

**Supplementary Fig. 12 | Models of Trm10-family enzyme/tRNA complexes, highlighting the different strategies to bind tRNA.** The models were generated using the structure of TRMT10C bound to tRNA<sup>His-Ser</sup> (PDB 8CBL, this work), tRNA<sup>Phe</sup> (PDB 6LVR) and AlphaFold models of the Trm10-family enzymes.

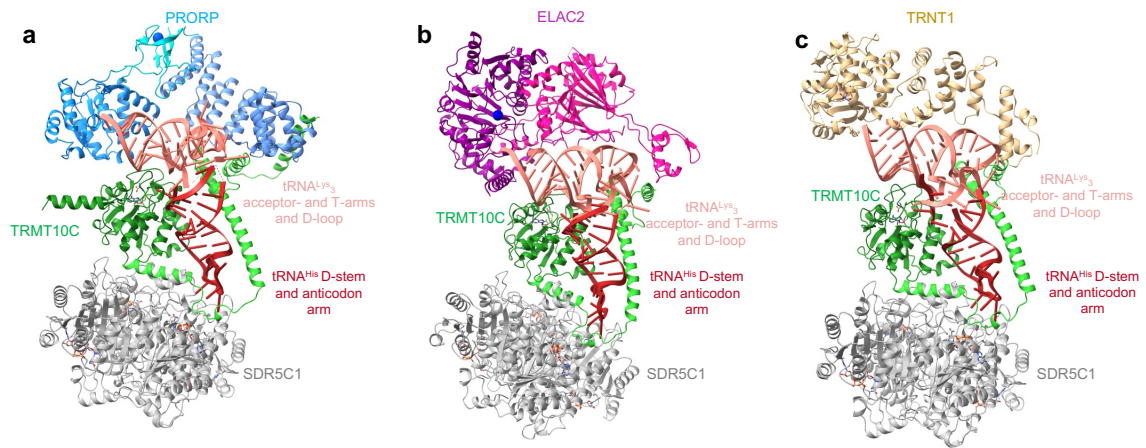

**Supplementary Fig. 13 | Models of tRNA maturation complexes for a tRNA with a stable elbow.**

The models were generated using the structure of mitochondrial tRNA maturation complexes of complex 2, 3 and 4 (Fig. 1) with the human tRNA<sup>Lys3</sup> acceptor- and T-arms plus the D-loop (in pink) aligned on the tRNA<sup>His</sup> structure (in red).

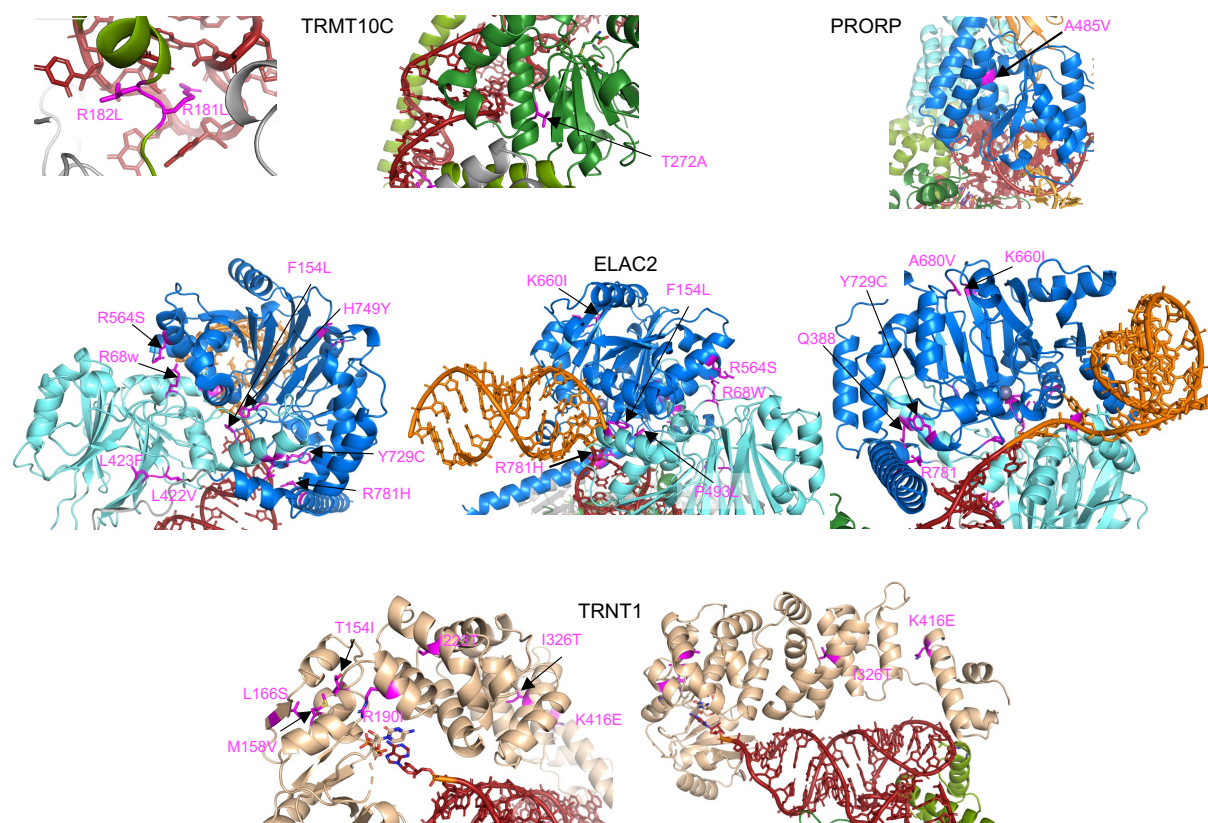

**Supplementary Fig. 14 | Structural mapping of disease mutations on the enzymes involved in human mt pre-tRNA maturation.** Disease mutations are indicated in pink.

## References

1. Robert, X. & Gouet, P. Deciphering key features in protein structures with the new ENDscript server. *Nucleic Acids Res* **42**, W320-324 (2014).
